# Supplementary material
Source: PubMed Central journal article supplement (PMC4839463)
Supplement: pnas.1521318113.sd01.pdf [file pnas.1521318113.sd01.pdf]

**Table S1. SNO-proteins and SNO-Cys sites**

| Gene Symbol | UniprotKB Access # | Entry name                                                         | SPI % | SNO-Site | Sequence (# denotes SNO-Cys site) | Cortex |      | Hipp   |      | Cerebellum |      |
|-------------|--------------------|--------------------------------------------------------------------|-------|----------|-----------------------------------|--------|------|--------|------|------------|------|
|             |                    |                                                                    |       |          |                                   | CK-p25 | Ctrl | CK-p25 | Ctrl | CK-p25     | Ctrl |
| Cnp         | P16330             | 2',3'-cyclic-nucleotide 3'-phosphodiesterase                       | 76.9  | C111c    | LDEDLAGY C# RR                    | ✓      |      | ✓      |      | ✓          |      |
| Cnp         | P16330             | 2',3'-cyclic-nucleotide 3'-phosphodiesterase                       | 71.3  | C157c    | LD C# AQLKEK                      | ✓      |      |        |      |            |      |
| Ado         | Q6PDY2             | 2-aminoethanethiol dioxygenase                                     | 68.7  | C225c    | EASGSA C# DLPR                    | ✓      | ✓    | ✓      | ✓    |            | ✓    |
| Rps27l      | Q6ZWY3             | 40S ribosomal proein S27-like                                      | 74.8  | C77c     | LTEG C# SFR                       | ✓      | ✓    | ✓      | ✓    |            | ✓    |
| Rps28       | P62858             | 40S ribosomal protein S28                                          | 76.3  | C27c     | TGSQGQ C# TQVR                    |        |      | ✓      | ✓    |            |      |
| Rpl10l      | P86048             | 60S ribosomal protein L10-like                                     | 83.1  | C195c    | LIPDG C# GVK                      | ✓      | ✓    | ✓      | ✓    | ✓          |      |
| Aco2        | Q99K10             | Aconitate hydratase, mitochondrial                                 | 66.5  | C385c    | VGLIGS C# TNSSYEDMGR              | ✓      |      |        |      | ✓          |      |
| Adss        | P46664             | Adenylosuccinate synthetase isozyme 2                              |       | C18c     | SISESSPAATSLPNDG C# GRPR          | ✓      |      |        |      |            |      |
| Arfgap1     | Q9EPJ9             | ADP-ribosylation factor GTPase-activating protein 1                | 69.9  | C350c    | SPSSDSWT C# ADASTGRR              | ✓      |      |        |      |            |      |
| Mllt4       | Q9QZQ1             | Afadin                                                             | 72.2  | C1700c   | DYEPPLSSAP C# APPPPPQR            | ✓      |      |        |      |            |      |
| Acan        | Q61282             | Aggrecan core protein                                              | 68.5  | C220c    | EG C# YGDKDEFPGVR                 | ✓      |      |        |      |            |      |
| Cap1        | P40124             | adenylyl cyclase-associated protein 1                              | 50.8  | C426c    | NSLDC# EIVSAK                     | ✓      |      |        |      |            |      |
| Add1        | Q9QYC0             | Alpha-adducin                                                      | 87.6  | C430c    | YSDVEVPASVTGHSFASDGDSGT C# SPLR   | ✓      |      |        |      |            |      |
| Add1        | Q9QYC0             | Alpha-adducin                                                      | 67.3  | C525c    | TAGPQSQVL C# GVMMDR               | ✓      |      |        |      |            |      |
| Eno1        | P17182             | Alpha-enolase                                                      | 83.7  | C399c    | TGAP C# RSER                      | ✓      |      | ✓      | ✓    | ✓          | ✓    |
| Fto         | Q8BGW1             | Alpha-ketoglutarate-dependent dioxygenase FTO                      | 64.2  | C184c    | AGVGPS C# DDEVDLKSR               | ✓      |      |        |      |            |      |
| Man2c1      | Q91W89             | Alpha-mannosidase 2C1                                              | 56    | C222c    | SFQALHTANQMVNI C# DPAQPETYPAK     | ✓      |      |        |      |            |      |
| Ank2        | Q8C8R3             | Ankyrin-2                                                          | 70.2  | C1538c   | SGT C# MRDEGR                     | ✓      | ✓    | ✓      | ✓    | ✓          |      |
| Amer2       | Q8CCJ4             | APC membrane recruitment protein 2                                 | 61.7  | C665c    | AAA C# HDSAK                      | ✓      |      | ✓      | ✓    |            | ✓    |
| Agap2       | Q3UHD9             | Arf-GAP with GTPase, ANK repeat and PH domain-containing protein 2 | 65.5  | C805c    | ALSTD C# TPSGDLSPLSR              | ✓      |      |        |      |            |      |
| As3mt       | Q91WU5             | Arsenite methyltransferase                                         | 58.3  | C33c     | TSADLQTNA C# VTR                  | ✓      |      |        |      |            |      |
| Asphd1      | Q2TA57             | Aspartate beta-hydroxylase domain-containing protein 1             | 71.9  | C95c     | AGGVSGMPDV C# SQTGPR              | ✓      |      |        |      |            |      |
| Astn1       | Q61137             | Astrotactin-1                                                      | 78.1  | C278c    | TLDSLQG C# NEK                    | ✓      | ✓    | ✓      |      |            |      |
| Ntrk2       | P15209             | BDNF/NT-3 growth factors receptor                                  | 94.3  | C176c    | SSPDTQDLY C# LNESSK               | ✓      | ✓    |        |      |            |      |
| Ntrk2       | P15209             | BDNF/NT-3 growth factors receptor                                  | 72.2  | C45c     | IW C# TEPSPGIVAFPR                | ✓      |      |        |      |            |      |
| Hexb        | P20060             | Beta-hexosaminidase subunit beta                                   | 83.1  | C288c    | NLLTP C# YNQK                     | ✓      |      |        |      |            |      |
| Hexb        | P20060             | Beta-hexosaminidase subunit beta                                   | 80.3  | C530c    | GIAAQPLYTYG C# NYENKI             | ✓      |      |        |      |            |      |
| Bcas1       | Q80YN3             | Breast carcinoma-amplified sequence 1 homolog                      | 89.2  | C389c    | S C# SPPPPPEPTSEGR                | ✓      | ✓    | ✓      | ✓    | ✓          | ✓    |
| Bcas1       | Q80YN3             | Breast carcinoma-amplified sequence 1 homolog                      | 57.1  | C574c    | EPAP C# VQPPTVEANAMQTGDKTPK       | ✓      | ✓    | ✓      | ✓    | ✓          | ✓    |
| Bcas1       | Q80YN3             | Breast carcinoma-amplified sequence 1 homolog                      | 89.7  | C318c    | ADSV C# DGHAAGQK                  | ✓      | ✓    | ✓      | ✓    | ✓          | ✓    |

**Table S1. SNO-proteins and SNO-Cys sites.** SNO-proteins and SNO-Cys sites detected in the cortex, hippocampus and cerebellum of control and CK-p25 mice. The ✓ symbol in the last column indicates the detection of the SNO-peptide using both Approach A and B according to tissue and genotype. SPI %, scored peak intensity obtained with Approach B. Hipp, hippocampus.

**Table S1. SNO-proteins and SNO-Cys sites**

| Gene Symbol | UniprotKB Access # | Entry name                                                                | SPI % | SNO-Site | Sequence (# denotes SNO-Cys site) | Cortex |      | Hipp   |      | Cerebellum |      |
|-------------|--------------------|---------------------------------------------------------------------------|-------|----------|-----------------------------------|--------|------|--------|------|------------|------|
|             |                    |                                                                           |       |          |                                   | CK-p25 | Ctrl | CK-p25 | Ctrl | CK-p25     | Ctrl |
| Bcan        | Q61361             | Brevican core protein                                                     | 93.5  | C692c    | SWEEAESQ C# R                     | ✓      | ✓    | ✓      | ✓    | ✓          | ✓    |
| Bcan        | Q61361             | Brevican core protein                                                     | 67.9  | C56c     | IGATQLRGLVGGALAI C# HVHHLRPPHSRR  | ✓      |      |        |      |            |      |
| C2cd5       | Q7TPS5             | C2 domain-containing protein 5                                            | 66.4  | C884c    | SAPP C# ASPTVGVVK                 | ✓      |      |        |      |            |      |
| Pde1b       | Q01065             | Calcium/calmodulin-dependent 3',5'-cyclic nucleotide phosphodiesterase 1B | 64.5  | C16c     | SPPEMLESD C# PSPLELK              | ✓      |      |        |      |            |      |
| Camkk1      | Q8VBY2             | Calcium/calmodulin-dependent protein kinase kinase 1                      | 41.1  | C122c    | VAISDTE C# VQLNQYK                | ✓      |      |        |      |            |      |
| Camkk2      | Q8C078             | Calcium/calmodulin-dependent protein kinase kinase 2                      | 72    | C548c    | AGP C# GGGGSALVK                  | ✓      | ✓    |        |      |            | ✓    |
| Camk2a      | P11798             | Calcium/calmodulin-dependent protein kinase type II subunit alpha         | 88.3  | C280c    | STVAS C# MHR                      | ✓      | ✓    | ✓      | ✓    |            | ✓    |
| Camk2a      | P11798             | Calcium/calmodulin-dependent protein kinase type II subunit alpha         | 59    | C289c    | QETVD C# LK                       | ✓      | ✓    | ✓      | ✓    |            | ✓    |
| Camk2b      | P28652             | Calcium/calmodulin-dependent protein kinase type II subunit beta          | 71.1  | C35c     | L C# TGHEYAAK                     | ✓      |      | ✓      |      |            | ✓    |
| Camsap2     | Q8C1B1             | Calmodulin-regulated spectrin-associated protein 2                        | 76.8  | C649c    | EALSP C# PSTISTK                  | ✓      |      |        |      |            | ✓    |
| Prkacb      | P68181             | cAMP-dependent protein kinase catalytic subunit beta                      | 81.1  | C349c    | C# GKEF C# EF                     |        | ✓    |        |      |            |      |
| Arpp21      | Q9DCB4             | cAMP-regulated phosphoprotein 21                                          | 93.3  | C71c     | SLAV C# EESSAR                    | ✓      | ✓    | ✓      | ✓    |            |      |
| Cnr1        | P47746             | Cannabinoid receptor 1                                                    | 79.3  | C450c    | AAES C# IKSTVK                    | ✓      | ✓    |        |      |            | ✓    |
| Ca4         | Q64444             | Carbonic anhydrase 4                                                      | 56.3  | C35c     | SS C# LGPEK                       |        |      |        |      |            | ✓    |
| Ceacam1     | P31809<br>Q925P2   | Carcinoembryonic antigen-related cell adhesion molecule 1                 | 81.5  | C217c    | TLTLLNVTNRDTPYV C# ETR            |        |      |        |      |            | ✓    |
| Caskin1     | Q6P9K8             | Caskin-1                                                                  | 95.2  | C1361c   | AAASVVSGPPVSD C# ASPGDSAR         | ✓      |      |        |      |            |      |
| Ctnnd2      | O35927             | Catenin delta-2                                                           | 70.5  | C506c    | QLQY C# ASVDSYK                   | ✓      |      |        |      |            |      |
| Ctsl        | P06797             | Cathepsin L1                                                              | 23    | C211c    | DGS C# KYR                        |        |      |        |      |            | ✓    |
| Cadm2       | Q8BLQ9             | Cell adhesion molecule 2                                                  | 60    | C248c    | IIPSTFPQEGQALTLT C# ESK           | ✓      |      |        |      |            |      |
| Cadm3       | Q99N28             | Cell adhesion molecule 3                                                  | 71.1  | C150c    | EKETATLN C# QSSGSKPAAQLTWR        | ✓      |      |        |      |            | ✓    |
| Cadm4       | Q8R464             | Cell adhesion molecule 4                                                  | 83.0  | C145c    | EQAVEGGEVELS C# LVPR              | ✓      |      |        |      |            |      |
| Cnbp        | P53996             | Cellular nucleic acid-binding protein                                     | 61    | C159c    | TSEVN C# YR                       | ✓      | ✓    | ✓      | ✓    |            | ✓    |
| Cep170      | Q6A065             | Centrosomal protein of 170 kDa                                            | 80.8  | C211c    | SQEAGASG C# STEAK                 |        |      |        |      |            | ✓    |
| Cep170      | Q6A065             | Centrosomal protein of 170 kDa                                            | 70.2  | C625c    | STS C# TTSLASQGER                 | ✓      | ✓    |        |      |            | ✓    |
| Chmp5       | Q9D7S9             | Charged multivesicular body protein 5                                     | 70.2  | C20c     | APPPSLTD C# IGTVDSR               | ✓      |      |        |      |            |      |
| Cspg5       | Q71M36             | Chondroitin sulfate proteoglycan 5                                        | 85.4  | C560c    | LEGGKGDQDDLGVN C# LQNNLT          | ✓      |      |        |      |            |      |
| Clasp2      | Q8BRT1             | CLIP-associating protein 2                                                | 71.6  | C968c    | KEDGDTI C# SGPMSDPR               | ✓      |      |        |      |            |      |
| Cfl1        | P18760             | Cofilin-1                                                                 | 76.9  | C80c     | MLPDKD C# R                       | ✓      | ✓    | ✓      | ✓    |            | ✓    |
| Csde1       | Q91W50             | Cold shock domain-containing protein E1                                   | 56.1  | C106c    | MNGQVV C# AVPHNLESK               | ✓      |      |        |      |            |      |

**Table S1. SNO-proteins and SNO-Cys sites.** SNO-proteins and SNO-Cys sites detected in the cortex, hippocampus and cerebellum of control and CK-p25 mice. The ✓ symbol in the last column indicates the detection of the SNO-peptide using both Approach A and B according to tissue and genotype. SPI %, scored peak intensity obtained with Approach B. Hipp, hippocampus.

**Table S1. SNO-proteins and SNO-Cys sites**

| Gene Symbol | UniprotKB Access # | Entry name                                                 | SPI % | SNO-Site       | Sequence (# denotes SNO-Cys site) | Cortex |      | Hipp   |      | Cerebellum |      |
|-------------|--------------------|------------------------------------------------------------|-------|----------------|-----------------------------------|--------|------|--------|------|------------|------|
|             |                    |                                                            |       |                |                                   | CK-p25 | Ctrl | CK-p25 | Ctrl | CK-p25     | Ctrl |
| Cplx1       | P63040             | Complexin-1                                                | 70.7  | C105c          | KAIPPG C# GDEPEEEDESILDTVIK       | ✓      |      |        |      |            |      |
| Cplx2       | P84086             | Complexin-2                                                | 86.8  | C90c           | AALEQP C# EGSLTRPK                | ✓      | ✓    |        | ✓    | ✓          | ✓    |
| Cntn1       | P12960             | Contactin-1                                                | 80.3  | C65c           | VSLN C# R                         |        |      | ✓      | ✓    | ✓          |      |
| Cntnap1     | O54991             | Contactin-associated protein 1                             | 81.8  | C1251c         | VQGELSESN C# GAMPR                | ✓      | ✓    |        |      |            |      |
| Cpne6       | Q9Z140             | Copine-6                                                   | 64.7  | C66c           | S C# SSPVFSR                      |        |      | ✓      | ✓    |            |      |
| Coro1c      | Q9WUM4             | Coronin-1C                                                 | 71.1  | C424c          | SELS C# APK                       |        | ✓    | ✓      |      |            |      |
| Cul2        | Q9D4H8             | Cullin-2                                                   | 62.3  | C266c          | VIHE C# QQR                       |        |      | ✓      |      |            |      |
| Uqcrh       | P99028             | Cytochrome b-c1 complex subunit 6, mitochondrial           | 87.9  | C51c           | LEL C# DNR                        | ✓      | ✓    | ✓      | ✓    | ✓          | ✓    |
| Uqcrh       | P99028             | Cytochrome b-c1 complex subunit 6, mitochondrial           | 74.2  | C79c           | DH C# VAHK                        | ✓      | ✓    | ✓      | ✓    | ✓          | ✓    |
| Uqcrh       | P99028             | Cytochrome b-c1 complex subunit 6, mitochondrial           | 64.6  | C35c           | EH C# EQLEK                       | ✓      | ✓    | ✓      | ✓    | ✓          | ✓    |
| Cox6b1      | P56391             | Cytochrome c oxidase subunit 6B1                           | 72.2  | C54c           | GGDVSV C# EWYR                    | ✓      |      |        |      |            |      |
| Hccs        | P53702             | Cytochrome c-type heme lyase                               | 82.8  | C70c           | AYDYVE C# PVTGAR                  | ✓      |      |        |      |            |      |
| Cyfp2       | Q5SQX6             | Cytoplasmic FMR1-interacting protein 2                     | 82.5  | C1253c         | C# FQPIHQSLATT C#                 | ✓      |      |        |      |            |      |
| Dmtn        | Q9WV69             | Dematin                                                    | 59.2  | C84c           | E C# SLSPK                        |        | ✓    |        |      |            |      |
| Dsg1a       | Q61495             | Desmoglein-1-alpha                                         | 56.9  | C702c          | nSMRE C# R                        |        | ✓    |        |      |            |      |
| Dstn        | Q9R0P5             | Destrin                                                    | 58    | C23c           | C# STPEEIKKR                      |        |      |        |      |            | ✓    |
| Rasd1       | O35626             | Dexamethasone-induced Ras-related protein 1                | 72.8  | C214c          | VSVQY C# DVLHkk                   | ✓      |      |        |      |            |      |
| Dpysl2      | O08553             | Dihydropyrimidinase-related protein 2                      | 96.9  | C504c          | GLYDGPV C# EVSVTPK                | ✓      |      | ✓      | ✓    | ✓          | ✓    |
| Dlgap3      | Q6PFD5             | Disks large-associated protein 3                           | 85.4  | C103c<br>C106c | MYPGQGPFDT C# ED C# VGHPQGK       | ✓      |      |        |      |            | ✓    |
| Dbl         | Q62418             | Drebrin-like protein                                       | 76.8  | C127c          | AEEDVEPE C# IMEK                  | ✓      |      |        |      |            |      |
| Map2k7      | Q8CE90             | Dual specificity mitogen-activated protein kinase kinase 7 | 57.5  | C296c          | SAG C# AAYMAPER                   |        |      |        |      |            | ✓    |
| Huwe1       | Q7TMY8             | E3 ubiquitin-protein ligase HUWE1                          | 58.4  | C3361c         | TKETN C# ESDRER                   | ✓      |      |        |      |            |      |
| Nedd4       | P46935             | E3 ubiquitin-protein ligase NEDD4                          | 90.6  | C365c          | LAV C# GNPATSQPVTSSNHSSR          | ✓      |      |        |      |            | ✓    |
| Erc1        | Q99M11             | ELKS/Rab6-interacting/CAST family member 1                 | 73.3  | C258c          | TGEP C# VAELTEENFQR               | ✓      |      |        |      |            |      |
| Eef1g       | Q9D8N0             | Elongation factor 1-gamma                                  | 91.4  | C266c          | AAAPAPEEEMDE C# EQALAAEPK         | ✓      |      |        |      |            |      |
| Tufm        | Q8BFR5             | Elongation factor Tu, mitochondrial                        | 76.9  | C127c          | HYAHTD C# PGHADYVK                | ✓      |      |        |      |            |      |
| Gpr3711     | Q99JG2             | Endothelin B receptor-like protein 2                       | 87.1  | C481c          | ESPPLLPLGTP C#                    | ✓      | ✓    | ✓      | ✓    | ✓          | ✓    |
| Gpr3711     | Q99JG2             | Endothelin B receptor-like protein 2                       | 85.7  | C203c          | LLGDVS C# R                       | ✓      | ✓    | ✓      | ✓    | ✓          | ✓    |
| Edc3        | Q8K2D3             | Enhancer of mRNA-decapping protein 3                       | 37.50 | C137c          | SQDVAISPQQ C# SK                  | ✓      |      |        |      |            |      |
| Echs1       | Q8BH95             | Enoyl-CoA hydratase, mitochondrial                         | 73.8  | C111c          | TFQD C# YSSK                      |        | ✓    |        |      |            |      |

**Table S1. SNO-proteins and SNO-Cys sites.** SNO-proteins and SNO-Cys sites detected in the cortex, hippocampus and cerebellum of control and CK-p25 mice. The ✓ symbol in the last column indicates the detection of the SNO-peptide using both Approach A and B according to tissue and genotype. SPI %, scored peak intensity obtained with Approach B. Hipp, hippocampus.

**Table S1. SNO-proteins and SNO-Cys sites**

| Gene Symbol | UniprotKB Access #         | Entry name                                              | SPI % | SNO-Site | Sequence (# denotes SNO-Cys site) | Cortex |      | Hipp   |      | Cerebellum |      |
|-------------|----------------------------|---------------------------------------------------------|-------|----------|-----------------------------------|--------|------|--------|------|------------|------|
|             |                            |                                                         |       |          |                                   | CK-p25 | Ctrl | CK-p25 | Ctrl | CK-p25     | Ctrl |
| Epha6       | Q62413                     | Ephrin type-A receptor 4                                | 59.2  | C4c      | TAAGYGDFSEPLEV                    | ✓      | ✓    |        |      |            |      |
| Slc1a3      | P56564                     | Excitatory amino acid transporter 1                     | 57.3  | C375c    | C# LEENNGVDKR                     |        |      |        |      | ✓          | ✓    |
| Slc1a2      | P43006                     | Excitatory amino acid transporter 2                     | 94.8  | C561c    | SAD C# SVEEEPWKRE                 | ✓      | ✓    | ✓      | ✓    | ✓          | ✓    |
| Fbxl16      | A2RT62                     | F-box/LRR-repeat protein 16                             | 87.4  | C47c     | NRP C# QPPPPPTLPPPSLATPLSR        | ✓      |      |        |      |            |      |
| Fxyd7       | P59648                     | FXYD domain-containing ion transport regulator 7        | 65.8  | C66c     | S C# KSELPSSAPGGGGV               | ✓      |      |        |      |            |      |
| Gprin1      | Q3UNH4                     | G protein-regulated inducer of neurite outgrowth 1      | 72.3  | C174c    | VDMP C# SSKVDIVSPGGDNAGSLR        | ✓      |      |        |      |            |      |
| Eno2        | P17183                     | Gamma-enolase                                           | 60.5  | C399c    | TGAP C# RSER                      |        |      | ✓      | ✓    |            |      |
| Gja1        | P23242                     | Gap junction alpha-1 protein                            | 75.8  | C298c    | LVTGDRNNS C# R                    | ✓      | ✓    | ✓      | ✓    | ✓          | ✓    |
| Gja1        | P23242                     | Gap junction alpha-1 protein                            | 80.5  | C260c    | SDPYHATTGPLSPSKD C# GSPK          | ✓      |      |        |      | ✓          |      |
| Gphn        | Q8BUV3                     | Gephyrin                                                | 79.9  | C284c    | LSTAS C# PTPK                     | ✓      |      | ✓      |      | ✓          | ✓    |
| Grid2       | Q61625                     | Glutamate receptor ionotropic, delta-2                  | 76.1  | C131c    | SG C# GLTR                        |        |      |        |      | ✓          | ✓    |
| Grin1       | P35438                     | Glutamate receptor ionotropic, NMDA 1                   | 71.4  | C798c    | YQE C# DSR                        | ✓      | ✓    | ✓      | ✓    |            | ✓    |
| Grin2b      | Q01097                     | Glutamate receptor ionotropic, NMDA 2B                  | 60.2  | C436c    | NTVP C# QKR                       | ✓      |      | ✓      | ✓    |            |      |
| Gfpt1       | P47856                     | Glutamine-fructose-6-phosphate aminotransferase 1       | 35.7  | C262c    | VDSTT C# LFPVEEK                  | ✓      |      |        |      |            |      |
| Glul        | P15105                     | Glutamine synthetase                                    | 90.2  | C49c     | TLD C# EPK                        | ✓      | ✓    | ✓      | ✓    | ✓          | ✓    |
| Gapdh       | P16858                     | Glyceraldehyde-3-phosphate dehydrogenase                | 89.7  | C150c    | IVSNAS C# TTN C# LAPLAK           | ✓      |      | ✓      |      | ✓          | ✓    |
| Gsk3b       | Q9WV60                     | Glycogen synthase kinase-3 beta                         | 56.7  | C14c     | TTSFAES C# KPVQQPSAFGSMK          | ✓      |      |        |      |            |      |
| Gpc1        | Q9QZF2<br>P51655<br>Q9R087 | Glypican-1                                              | 65    | C32c     | S C# SEVR                         |        | ✓    |        |      |            |      |
| Gprasp1     | Q5U4C1                     | G-protein coupled receptor-associated sorting protein 1 | 64.5  | C535c    | SVGVN C# EkMPK                    | ✓      | ✓    | ✓      | ✓    | ✓          | ✓    |
| Gnao1       | P18872                     | Guanine nucleotide-binding protein G(o) subunit alpha   | 76.6  | C108c    | MV C# DVVSR                       | ✓      |      | ✓      |      | ✓          |      |
| Hpx         | Q91X72                     | Hemopexin                                               | 70.9  | C458c    | SLPQPQKVNSILG C# SQ               | ✓      |      |        |      |            |      |
| Hdgf        | P51859                     | Hepatoma-derived growth factor                          | 76.3  | C12c     | QKEYK C# GDLVFAK                  |        |      |        |      | ✓          |      |
| Hpcal1      | P62748                     | Hipocalcin-like protein 1                               | 55.3  | C185c    | LLQ C# DPSSASQF                   | ✓      |      |        | ✓    |            | ✓    |
| Homer3      | Q99JP6                     | Homer protein homolog 3                                 | 79    | C311c    | SME C# NLEEAR                     |        |      |        |      | ✓          | ✓    |
| Hapln1      | Q9QUP5                     | Hyaluronan and proteoglycan link protein 1              | 78.4  | C327c    | C# SPTEAAVR                       |        | ✓    | ✓      | ✓    |            |      |
| N/A         | P01837                     | Ig kappa chain C region                                 | 56.4  | C106c    | SFNRNE C#                         | ✓      |      |        |      |            |      |
| Igsf21      | Q7TNR6                     | Immunoglobulin superfamily member 21                    | 76.9  | C116c    | ISDNNGPYE C# HVGIYDR              | ✓      |      |        |      |            |      |
| Igsf8       | Q8R366                     | Immunoglobulin superfamily member 8                     | 58.6  | C184c    | LTVHEGQELALG C# LAQTK             | ✓      |      |        |      | ✓          |      |
| Itpka       | Q8R071                     | Inositol-trisphosphate 3-kinase A                       | 55.2  | C19c     | GAGP C# SPGLER                    | ✓      |      |        |      |            |      |
| Itgav       | P43406                     | Integrin alpha-V                                        | 52.3  | C172c    | TVEYAP C# R                       |        |      | ✓      |      |            |      |

**Table S1. SNO-proteins and SNO-Cys sites.** SNO-proteins and SNO-Cys sites detected in the cortex, hippocampus and cerebellum of control and CK-p25 mice. The ✓ symbol in the last column indicates the detection of the SNO-peptide using both Approach A and B according to tissue and genotype. SPI %, scored peak intensity obtained with Approach B. Hipp, hippocampus.

**Table S1. SNO-proteins and SNO-Cys sites**

| Gene Symbol | UniprotKB Access # | Entry name                                                                  | SPI % | SNO-Site     | Sequence (# denotes SNO-Cys site) | Cortex |      | Hipp   |      | Cerebellum |      |
|-------------|--------------------|-----------------------------------------------------------------------------|-------|--------------|-----------------------------------|--------|------|--------|------|------------|------|
|             |                    |                                                                             |       |              |                                   | CK-p25 | Ctrl | CK-p25 | Ctrl | CK-p25     | Ctrl |
| Icam5       | Q60625             | Intercellular adhesion molecule 5                                           | 94    | C607c        | VE C# VGSEGA SEGIVLPLVSSNSGPR     | ✓      | ✓    | ✓      | ✓    |            |      |
| Icam5       | Q60625             | Intercellular adhesion molecule 5                                           | 63.8  | C431c        | SWTWPEGPEQTLH C# EAR              | ✓      |      |        |      |            |      |
| Icam5       | Q60625             | Intercellular adhesion molecule 5                                           | 56.6  | C551c        | C# EAINAR                         |        | ✓    |        | ✓    |            |      |
| Icam5       | Q60625             | Intercellular adhesion molecule 5                                           | 80.7  | C724c        | C# VATNAHGTD SR                   | ✓      | ✓    | ✓      | ✓    |            |      |
| Icam5       | Q60625             | Intercellular adhesion molecule 5                                           | 92.1  | C415c        | LDDLD C# PR                       | ✓      | ✓    | ✓      | ✓    |            |      |
| Iqsec1      | Q8R0S2             | IQ motif and SEC7 domain-containing protein 1                               | 82    | C904c        | A C# LDDSYASGEGLKR                | ✓      |      |        |      |            |      |
| Iqsec2      | Q5DU25             | IQ motif and SEC7 domain-containing protein 2                               | 56.8  | C616c        | QLVYEADG C# SPHGTLK               | ✓      |      |        |      |            |      |
| Iscu        | Q9D7P6             | Iron-sulfur cluster assembly enzyme ISCU, mitochondrial                     | 65.3  | C70c         | NVGTGLVGAPA C# GDVMK              | ✓      |      |        |      |            |      |
| Asrgl1      | Q8C0M9             | Isoaspartyl peptidase/L-asparaginase                                        | 77.2  | C317c        | LQAGIDL C# ETR                    | ✓      | ✓    | ✓      | ✓    | ✓          | ✓    |
| Asrgl1      | Q8C0M9             | Isoaspartyl peptidase/L-asparaginase                                        | 85.9  | C179c        | GAQNAD C# PK                      | ✓      | ✓    | ✓      | ✓    | ✓          | ✓    |
| Asrgl1      | Q8C0M9             | Isoaspartyl peptidase/L-asparaginase                                        | 75.4  | C326c        | TRDLP C#                          | ✓      | ✓    | ✓      | ✓    | ✓          | ✓    |
| Krt17       | Q9QWL7             | Keratin, type I cytoskeletal 17                                             | 60.1  | C29c<br>C40c | TS C# RLSGSLGAGS C# R             | ✓      |      |        |      |            | ✓    |
| Krt81       | Q9ERE2<br>P97861   | Keratin, type II cuticular Hb1 (Fragment)                                   | 55.3  | C210c        | TK C# EEIK                        |        |      |        |      |            | ✓    |
| Fn3krp      | Q8K274             | Ketosamine-3-kinase                                                         | 63.8  | C24c         | ATGHSGGG C# ISQGQSYD TDKGR        |        |      |        |      |            | ✓    |
| Khdrbs1     | Q60749             | KH domain-containing, RNA-binding, signal transduction-associated protein 1 | 83.7  | C19c         | S C# SKDPSGAHPSVR                 | ✓      | ✓    | ✓      | ✓    | ✓          | ✓    |
| Kcp         | Q3U492             | Kielin/chordin-like protein                                                 | 76.9  | C278c        | I C# Q C# LEGHIQ C# R             | ✓      |      |        |      |            |      |
| Kif1a       | P33173             | Kinesin-like protein KIF1A                                                  | 68.2  | C609c        | TP C# AETPAEPVDWAF AQR            | ✓      |      |        |      |            |      |
| Lama1       | P19137             | Laminin subunit alpha-1                                                     | 66.4  | C3038c       | QN C# LSSR                        |        |      |        | ✓    |            |      |
| Llg1        | Q80Y17             | Lethal(2) giant larvae protein homolog 1                                    | 68.3  | C190c        | SVPDDYR C# GK                     |        |      |        |      |            | ✓    |
| Luzp1       | Q8R4U7             | Leucine zipper protein 1                                                    | 87.7  | C561c        | GQVPGHASQGTQAVES S C# SK          |        |      |        |      |            | ✓    |
| Lgi1        | Q9JIA1             | Leucine-rich glioma-inactivating protein 1                                  | 70.7  | C55c         | DNAL C# ENAR                      | ✓      |      | ✓      | ✓    | ✓          |      |
| Lgi3        | Q8K406             | Leucine-rich repeat LGI family member 3                                     | 76    | C52c         | DTAF C# VDSK                      |        | ✓    |        |      | ✓          | ✓    |
| Rltpr       | Q3V3V9             | Leucine-rich repeat-containing protein 16C                                  | 71.2  | C1227c       | TSPAPDILSLPEDP C# LGPR            | ✓      |      |        |      |            |      |
| Lrrc7       | Q80TE7             | Leucine-rich repeat-containing protein 7                                    | 69.7  | C541c        | SM C# APLPVA AQSTTLPLSLGR         | ✓      |      |        |      |            |      |
| Lsamp       | Q8BLK3             | Limbic system-associated membrane protein                                   | 76.2  | C239c        | C# EASAVPAPDFE WYRDDTR            |        | ✓    |        |      |            | ✓    |
| Lsamp       | Q8BLK3             | Limbic system-associated membrane protein                                   | 78.7  | C197c        | EQSGKYE C# K                      | ✓      | ✓    | ✓      | ✓    | ✓          | ✓    |
| Lppr4       | Q7TME0             | Lipid phosphate phosphatase-related protein type 4                          | 84.7  | C605c        | NAEGSTVT C# TGSIR                 | ✓      | ✓    | ✓      | ✓    |            |      |
| Lppr4       | Q7TME0             | Lipid phosphate phosphatase-related protein type 4                          | 66.7  | C569c        | TVA C# NR                         | ✓      | ✓    | ✓      | ✓    |            |      |
| Ldha        | P06151             | L-lactate dehydrogenase A chain                                             | 77.8  | C84c         | IVSSKDY C# VTANSK                 |        |      | ✓      | ✓    | ✓          |      |

**Table S1. SNO-proteins and SNO-Cys sites.** SNO-proteins and SNO-Cys sites detected in the cortex, hippocampus and cerebellum of control and CK-p25 mice. The ✓ symbol in the last column indicates the detection of the SNO-peptide using both Approach A and B according to tissue and genotype. SPI %, scored peak intensity obtained with Approach B. Hipp, hippocampus.

**Table S1. SNO-proteins and SNO-Cys sites**

| Gene Symbol | UniprotKB Access # | Entry name                                                   | SPI % | SNO-Site     | Sequence (# denotes SNO-Cys site)          | Cortex |      | Hipp   |      | Cerebellum |      |
|-------------|--------------------|--------------------------------------------------------------|-------|--------------|--------------------------------------------|--------|------|--------|------|------------|------|
|             |                    |                                                              |       |              |                                            | CK-p25 | Ctrl | CK-p25 | Ctrl | CK-p25     | Ctrl |
| AcsL4       | Q9QUJ7             | Long-chain-fatty-acid--CoA ligase 4                          | 66.7  | C157c        | NTIAIF C# ETR                              | ✓      |      |        |      |            |      |
| Prnp        | P04925             | Major prion protein                                          | 94.5  | C213c        | VVEQM C# VTQYQK                            | ✓      | ✓    |        | ✓    | ✓          | ✓    |
| Mdh1        | P14152             | Malate dehydrogenase, cytoplasmic                            | 74.9  | C154c        | SAPSIPKENFS C# LTR                         | ✓      |      |        |      |            |      |
| Madd        | Q80U28             | MAP kinase-activating death domain protein                   | 83.6  | C763c        | QTETGEGSV C# QR                            | ✓      | ✓    | ✓      | ✓    |            | ✓    |
| Map7d1      | A2AJI0             | MAP7 domain-containing protein 1                             | 84.2  | C375c        | SASASPLTP C# SAPR                          | ✓      | ✓    |        |      | ✓          | ✓    |
| Map1a       | Q9QYR6             | Microtubule-associated protein 1A                            | 93.9  | C2165c       | SAP C# GSLAFSGDR                           | ✓      | ✓    |        | ✓    |            | ✓    |
| Map1a       | Q9QYR6             | Microtubule-associated protein 1A                            | 55.4  | C2058c       | APISLSQDPSPLNGSTTS C# GPDRR                | ✓      |      |        |      |            |      |
| Map1b       | P14873             | Microtubule-associated protein 1B                            | 93.6  | C1913c       | TIKSP C# DSGYSYETIEK                       | ✓      | ✓    |        |      | ✓          | ✓    |
| Map1b       | P14873             | Microtubule-associated protein 1B                            | 91.9  | C1936c       | TIKTPEDGGYT C# EITEK                       | ✓      |      |        |      | ✓          |      |
| Map1b       | P14873             | Microtubule-associated protein 1B                            | 79.5  | C1224c       | SALRDAY C# SEEKELK                         | ✓      |      |        |      |            |      |
| Map1b       | P14873             | Microtubule-associated protein 1B                            | 61.8  | C2037c       | SPDTSAY C# YETMEK                          | ✓      | ✓    |        |      |            |      |
| Map1b       | P14873             | Microtubule-associated protein 1B                            | 55    | C2061c       | TPQASTYSYETSDR C# YTTEK                    | ✓      |      |        |      |            |      |
| Map1a       | Q9QYR6             | Microtubule-associated protein 1a                            | 73.1  | C2165c       | SAP C# GSLAFSGDR                           | ✓      | ✓    |        | ✓    |            | ✓    |
| Map2        | P20357             | Microtubule-associated protein 2                             | 62.7  | C759c        | MP C# FPIESKEEEDKAEQAK                     | ✓      |      |        |      |            |      |
| Map6        | Q7TSJ2             | Microtubule-associated protein 6                             | 80    | C500c        | SLYSEPFKE C# PKVEKPSVQSSKPK                |        |      |        |      |            | ✓    |
| Mapre3      | Q6PER3             | Microtubule-associated protein RP/EB family member 3         | 71.8  | C182c        | LSNVAPP C# ILRKNPPSAR                      | ✓      |      |        |      |            | ✓    |
| Mapt        | P10637             | Microtubule-associated protein tau                           | 61.3  | C151c        | EAT C# QPSGTRPEDIEK                        | ✓      |      |        |      |            | ✓    |
| Mtch2       | Q791V5             | Mitochondrial carrier homolog 2                              | 79.5  | C296c        | TY C# YDLR                                 | ✓      | ✓    | ✓      | ✓    | ✓          | ✓    |
| Tomm40      | Q9QYA2             | Mitochondrial import receptor subunit TOM40 homolog          | 80.8  | C74c         | TPGAAASGAAAASEDGS C# G C# LPNPGTFEE C# HRK | ✓      |      |        |      |            |      |
| Marc2       | Q922Q1             | MOSC domain-containing protein 2, mitochondrial              | 66.5  | C74c         | GVSV C# ETE C# TDMGLR                      | ✓      |      |        |      |            |      |
| Rnmt        | Q9D0L8             | mRNA cap guanine-N7 methyltransferase                        | 65.2  | C37c         | LPENTPP C# QQVDQPK                         | ✓      |      |        |      |            |      |
| Muc6        | Q80T03             | Mucin-6                                                      | 56.9  | C966c        | VLTENVI C# GkSGVT C# SR                    | ✓      |      |        |      |            |      |
| Plp1        | P60202             | Myelin proteolipid protein                                   | 92.7  | C201c        | TSASIGSL C# ADAR                           | ✓      | ✓    | ✓      | ✓    | ✓          | ✓    |
| Plp1        | P60202             | Myelin proteolipid protein                                   | 75.2  | C109c        | TTI C# GK                                  |        |      | ✓      |      |            | ✓    |
| Mag         | P20917             | Myelin-associated glycoprotein                               | 61.9  | C488c        | VI C# TSR                                  | ✓      |      | ✓      |      | ✓          |      |
| Mog         | Q61885             | Myelin-oligodendrocyte glycoprotein                          | 83.5  | C52c         | ALVGDEAELP C# R                            | ✓      |      |        |      |            |      |
| Myadm       | O35682             | Myeloid-associated differentiation marker                    | 74    | C273c        | SMDPS C# TR                                | ✓      |      | ✓      | ✓    | ✓          |      |
| Ndufs1      | Q91VD9             | NADH-ubiquinone oxidoreductase 75 kDa subunit, mitochondrial | 88.5  | C727c        | AVTEGAQAVEEPI C#                           | ✓      |      |        |      |            | ✓    |
| Ganab       | Q8BHN3             | Neutral alpha-glucosidase AB                                 | 57.4  | C41c<br>C47c | T C# DESSF C# K                            | ✓      |      |        |      |            |      |
| Ncam1       | P13595             | Neural cell adhesion molecule 1                              | 95.4  | C288c        | NVDKNDEAEYV C# IAENK                       | ✓      | ✓    | ✓      | ✓    |            | ✓    |

**Table S1. SNO-proteins and SNO-Cys sites.** SNO-proteins and SNO-Cys sites detected in the cortex, hippocampus and cerebellum of control and CK-p25 mice. The ✓ symbol in the last column indicates the detection of the SNO-peptide using both Approach A and B according to tissue and genotype. SPI %, scored peak intensity obtained with Approach B. Hipp, hippocampus.

**Table S1. SNO-proteins and SNO-Cys sites**

| Gene Symbol | UniprotKB Access # | Entry name                                             | SPI % | SNO-Site | Sequence (# denotes SNO-Cys site) | Cortex |      | Hipp   |      | Cerebellum |      |
|-------------|--------------------|--------------------------------------------------------|-------|----------|-----------------------------------|--------|------|--------|------|------------|------|
|             |                    |                                                        |       |          |                                   | CK-p25 | Ctrl | CK-p25 | Ctrl | CK-p25     | Ctrl |
| Ncam1       | P13595             | Neural cell adhesion molecule 1                        | 80.2  | C189c    | TDEGTYR C# EGR                    |        | ✓    |        |      | ✓          |      |
| Ncam2       | O35136             | Neural cell adhesion molecule 2                        | 84.6  | C380c    | LSDSGRYD C# EAASR                 | ✓      |      |        |      |            |      |
| Ncam2       | O35136             | Neural cell adhesion molecule 2                        | 63.8  | C136c    | QGEDAIEVV C# R                    | ✓      |      |        |      |            |      |
| L1cam       | P11627             | Neural cell adhesion molecule L1                       | 55    | C353c    | LD C# QVQGRPQPEITWR               | ✓      | ✓    | ✓      | ✓    | ✓          | ✓    |
| Nrxn1       | Q9CS84             | Neurexin-1                                             | 56.2  | C679c    | QMAEIQSTAGVKPS C# SK              | ✓      |      |        |      |            |      |
| Ncald       | Q91X97             | Neurocalcin-delta                                      | 82.7  | C185c    | LLQ C# DPSSAGQF                   | ✓      |      |        |      |            |      |
| Ncan        | P55066             | Neurocan core protein                                  | 83.5  | C1167c   | GTVL C# GPPPAVENASLVGVR           | ✓      | ✓    |        |      |            |      |
| Ncan        | P55066             | Neurocan core protein                                  | 66.8  | C354c    | FDAY C# FR                        | ✓      |      |        |      |            |      |
| Ncan        | P55066             | Neurocan core protein                                  | 63    | C279c    | AQ C# QR                          | ✓      |      |        |      |            |      |
| Ncdn        | Q9Z0E0             | Neurochondrin                                          | 81.9  | C725c    | MAALEQ C# LSEP                    | ✓      |      |        | ✓    |            | ✓    |
| Scg5        | P12961             | Neuroendocrine protein 7B2                             | 62.1  | C130c    | TADDG C# LENAPDTAEFSR             | ✓      |      |        |      |            |      |
| Nfasc       | Q810U3             | Neurofascin                                            | 93.3  | C118c    | SGGRPEEYEGEYQ C# FAR              | ✓      |      |        |      |            |      |
| Nfasc       | Q810U3             | Neurofascin                                            | 81.2  | C63c     | DNILIE C# EAK                     | ✓      | ✓    |        | ✓    |            | ✓    |
| Nrgn        | P60761             | Neurogranin                                            | 73.1  | C51c     | SGE C# GRKGPGGPGGAGGAR            | ✓      | ✓    | ✓      | ✓    | ✓          | ✓    |
| Nrgn        | P60761             | Neurogranin                                            | 94.8  | C51c     | SGE C# GR                         | ✓      | ✓    | ✓      | ✓    | ✓          | ✓    |
| Nrcam       | Q810U4             | Neuronal cell adhesion molecule                        | 73.5  | C519c    | DSTGTYT C# VAR                    | ✓      | ✓    | ✓      | ✓    |            | ✓    |
| Nrcam       | Q810U4             | Neuronal cell adhesion molecule                        | 85.3  | C62c     | ENIVIQ C# EAK                     | ✓      | ✓    | ✓      | ✓    |            | ✓    |
| Negr1       | Q80Z24             | Neuronal growth regulator 1                            | 77.7  | C197c    | DQAGEYE C# SAENDVSPDVKK           | ✓      |      |        |      |            |      |
| Hpca        | P84075             | Neuron-specific calcium-binding protein hippocalcin    | 86.3  | C185c    | LLQ C# DPSSASQF                   | ✓      |      |        |      |            |      |
| Nptn        | P97300             | Neuroplastin                                           | 92.7  | C116c    | LTLEDSTGYE C# R                   | ✓      | ✓    | ✓      | ✓    | ✓          | ✓    |
| Nptn        | P97300             | Neuroplastin                                           | 84.9  | C258c    | SENKNEGQDAMMY C# K                | ✓      | ✓    | ✓      | ✓    | ✓          | ✓    |
| Nptn        | P97300             | Neuroplastin                                           | 73.7  | C217c    | AEDSGEYH C# VYHFVSAPK             | ✓      |      |        |      |            |      |
| Ntm         | Q99PJ0             | Neurotrimin                                            | 93.5  | C201c    | EQSGEYE C# SASNDVAAPVVR           | ✓      |      | ✓      |      |            | ✓    |
| Slc1a4      | O35874<br>P56564   | Neutral amino acid transporter A                       | 90.7  | C355c    | C# IEENNGVDKR                     |        |      | ✓      | ✓    |            | ✓    |
| Ovch2       | Q7M761             | Ovochymase-2                                           | 60.5  | C265c    | GAWTLAGVTSWGLG C# GRSWRNnAR       |        |      |        | ✓    |            |      |
| Cask        | O70589             | Peripheral plasma membrane protein CASK                | 65.6  | C684c    | VA C# IAMEK                       |        |      |        | ✓    |            |      |
| Prdx5       | P99029             | Peroxiredoxin-5, mitochondrial                         | 75.4  | C200c    | ALNVEPDGTGLT C# SLAPNILSQ         | ✓      |      |        |      |            |      |
| Prdx6       | O08709             | Peroxiredoxin-6                                        | 91.3  | C47c     | DFTPV C# TTELGR                   | ✓      |      |        |      |            |      |
| Pip5k1c     | O70161             | Phosphatidylinositol 4-phosphate 5-kinase type-1 gamma | 56.7  | C581c    | ITVQVEPV C# GVGVPK                | ✓      | ✓    |        |      |            |      |
| Phyhipl     | Q8BGT8<br>Q8K0S0   | Phytanoyl-CoA hydroxylase-interacting protein-like     | 64.5  | C369c    | T C# NISVGR                       | ✓      |      | ✓      | ✓    | ✓          | ✓    |

**Table S1. SNO-proteins and SNO-Cys sites.** SNO-proteins and SNO-Cys sites detected in the cortex, hippocampus and cerebellum of control and CK-p25 mice. The ✓ symbol in the last column indicates the detection of the SNO-peptide using both Approach A and B according to tissue and genotype. SPI %, scored peak intensity obtained with Approach B. Hipp, hippocampus.

**Table S1. SNO-proteins and SNO-Cys sites**

| Gene Symbol | UniprotKB Access #                             | Entry name                                                                     | SPI % | SNO-Site       | Sequence (# denotes SNO-Cys site) | Cortex |      | Hipp   |      | Cerebellum |      |
|-------------|------------------------------------------------|--------------------------------------------------------------------------------|-------|----------------|-----------------------------------|--------|------|--------|------|------------|------|
|             |                                                |                                                                                |       |                |                                   | CK-p25 | Ctrl | CK-p25 | Ctrl | CK-p25     | Ctrl |
| Pithd1      | Q8BWR2                                         | PITH domain-containing protein-1                                               | 36.9  | C188c          | HEVTI C# NYESANPADHR              | ✓      |      |        |      |            |      |
| Adcyap1r1   | P70205                                         | Pituitary adenylate cyclase-activating polypeptide type I receptor             | 80.2  | C34c           | EQAM C# LER                       | ✓      |      | ✓      | ✓    | ✓          | ✓    |
| Atp2b2      | Q9R0K7                                         | Plasma membrane calcium-transporting ATPase 2                                  | 94.4  | C621c          | VIEPMA C# DGLR                    | ✓      | ✓    | ✓      | ✓    | ✓          | ✓    |
| Atp2b2      | Q9R0K7                                         | Plasma membrane calcium-transporting ATPase 2                                  | 55.4  | C628c          | TI C# VAYR                        |        |      |        |      |            | ✓    |
| Plxna4      | Q80UG2                                         | Plexin-A4                                                                      | 68.1  | C103c          | IVQT C# NEPLASTNNVNK              | ✓      |      |        |      |            |      |
| Pcbp1       | P60335                                         | Poly(rC)-binding protein 1                                                     | 91.9  | C194c          | VMTIPYQMPASSPVI C# AGGQDR         | ✓      | ✓    |        |      |            |      |
| Pcbp1       | P60335<br>Q61990<br>P57722                     | Poly(rC)-binding protein 1                                                     | 60.2  | C54c           | INISEGN C# PER                    |        |      |        |      |            | ✓    |
| Hcn2        | O88703                                         | Potassium/sodium hyperpolarization-activated cyclic nucleotide-gated channel 2 | 55    | C69c           | DSA C# TPGAACK                    |        |      |        |      |            | ✓    |
| Atp12a      | Q9Z1W8                                         | Potassium-transporting ATPase alpha 2                                          | 91.1  | C367c          | KN C# LVK                         |        |      |        | ✓    | ✓          | ✓    |
| Atp12a      | Q9Z1W8<br>Q8VDN2<br>Q6PIE5<br>Q6PIC6<br>Q9WV27 | Potassium-transporting ATPase alpha 2                                          | 96.7  | C716c          | LIIVEG C# QR                      |        |      |        | ✓    | ✓          | ✓    |
| Gpr37       | Q9QY42                                         | Probable G-protein coupled receptor 37                                         | 43.1  | C600c          | EMSTFASVGTG C#                    | ✓      |      |        |      |            |      |
| Gpr158      | Q8C419                                         | Probable G-protein coupled receptor 158                                        | 79.8  | C1166c         | AEV C# PWEFEPLEQPNAER             | ✓      |      |        |      |            |      |
| Lrp1        | Q91ZX7                                         | Prolow-density lipoprotein receptor-related protein 1                          | 70.5  | C2518c         | ILQEDFT C# R                      | ✓      |      | ✓      |      |            |      |
| Ptges2      | Q8BWM0                                         | Prostaglandin E synthase 2                                                     | 58    | C382c          | AIEEAPSVHHVNPS C# KD              |        |      |        |      |            | ✓    |
| Bsn         | O88737                                         | Protein bassoon                                                                | 85.1  | C1133c         | SS C# SEYSPSPSLDSEAETLDGGPTR      | ✓      |      |        |      |            |      |
| Fam114a2    | Q8VE88                                         | Protein FAM114A2                                                               | 69.9  | C490c          | TESST C# EPQSR                    | ✓      |      |        |      |            |      |
| Phf24       | Q80TL4                                         | Protein KIAA1045                                                               | 76.7  | C334c          | LTEAPS C# SVSISHVGPIADSSPAASSSK   | ✓      |      |        |      |            |      |
| Prkce       | P16054                                         | Protein kinase C epsilon type                                                  | 68.1  | C74c           | TNSPAWHDEFVTDV C# NGR             | ✓      |      |        |      |            |      |
| Prkcg       | P63318                                         | Protein kinase C gamma type                                                    | 90.4  | C305c          | FEA C# NYPLELYER                  | ✓      |      |        |      |            |      |
| Prkcg       | P63318                                         | Protein kinase C gamma type                                                    | 73.5  | C150c          | SVPSL C# GVDHTERR                 | ✓      |      |        |      |            | ✓    |
| Prkcg       | P63318                                         | Protein kinase C gamma type                                                    | 60.6  | C133c          | C# S C# C# EMNVHRR                | ✓      |      |        |      |            | ✓    |
| Ndrg2       | Q9QYG0                                         | Protein NDRG2                                                                  | 82.7  | C371c          | TLSQSSESGTLPSGPPGHTMEVS C#        | ✓      | ✓    |        |      |            |      |
| Ndrg3       | Q9QYF9                                         | Protein NDRG3                                                                  | 81.1  | C375c          | HQTMEVS C#                        | ✓      | ✓    | ✓      | ✓    |            | ✓    |
| Odr4        | Q4PJX1                                         | Protein odr-4 homolog                                                          | 56.2  | C274c<br>C286c | STATVQI C# SGSVNLRGnVK C# R       |        |      |        |      |            | ✓    |
| Ppp1r1a     | Q9ERT9                                         | Protein phosphatase 1 regulatory subunit 1A                                    | 72.5  | C147c          | TQEQ C# GVEPR                     | ✓      | ✓    | ✓      | ✓    |            |      |
| Ppp1r1b     | Q60829                                         | Protein phosphatase 1 regulatory subunit 1B                                    | 72.9  | C148c          | GTVGQKPT C# GR                    | ✓      | ✓    | ✓      | ✓    |            | ✓    |
| Ppp1r1b     | Q60829                                         | Protein phosphatase 1 regulatory subunit 1B                                    | 61.4  | C72c           | SKRPNP C# AYTPPSLK                | ✓      |      |        |      |            |      |

**Table S1. SNO-proteins and SNO-Cys sites.** SNO-proteins and SNO-Cys sites detected in the cortex, hippocampus and cerebellum of control and CK-p25 mice. The ✓ symbol in the last column indicates the detection of the SNO-peptide using both Approach A and B according to tissue and genotype. SPI %, scored peak intensity obtained with Approach B. Hipp, hippocampus.



**Table S1. SNO-proteins and SNO-Cys sites**

| Gene Symbol | UniprotKB Access # | Entry name                                               | SPI % | SNO-Site | Sequence (# denotes SNO-Cys site)    | Cortex |      | Hipp   |      | Cerebellum |      |
|-------------|--------------------|----------------------------------------------------------|-------|----------|--------------------------------------|--------|------|--------|------|------------|------|
|             |                    |                                                          |       |          |                                      | CK-p25 | Ctrl | CK-p25 | Ctrl | CK-p25     | Ctrl |
| Pclo        | Q9QYX7             | Protein piccolo                                          | 71.5  | C1222c   | VASLA C#<br>EGEQQPDRPEDLPGATPQTLPKDR | ✓      |      |        |      |            |      |
| Shisa9      | Q9CZN4             | Protein shisa-9                                          | 63.9  | C397c    | LGIAESGS C# DPLGTR                   | ✓      |      |        |      |            |      |
| Dnajc6      | Q80TZ3             | Putative tyrosine-protein phosphatase auxilin            | 46.3  | C16c     | HYQTIQEAGDW C# VPSTEPK               | ✓      |      |        |      |            |      |
| Rab3gap1    | Q80UJ7             | Rab3 GTPase-activating protein catalytic subunit         | 42.2  | C919c    | SG C# PEER                           |        |      |        |      | ✓          | ✓    |
| Rabl6       | Q5U3K5             | Rab-like protein 6                                       | 95.3  | C501c    | VAPQQ C# SEPETK                      | ✓      |      |        |      |            | ✓    |
| Ralbp1      | Q62172             | RalA-binding protein 1                                   | 58.2  | C622c    | GGIGPPP C# DGVLEVR                   | ✓      |      |        |      |            |      |
| Rap1gap2    | Q5SVL6             | Rap1 GTPase-activating protein 2                         | 57.1  | C565c    | TR C# DSASSTPK                       | ✓      |      |        |      |            |      |
| Syngap1     | F6SEU4             | Ras GTPase-activating protein SynGAP                     | 93.7  | C821c    | SSPAY C# TSSSDITEPEQK                | ✓      |      |        |      |            |      |
| Rtn1        | Q8K0T0             | Reticulon-1                                              | 77.4  | C64c     | EL C# SGPAR                          | ✓      | ✓    | ✓      | ✓    | ✓          | ✓    |
| Rtn3        | Q9ES97             | Reticulon-3                                              | 72.9  | C559c    | V C# SAAPPSVLNETGFSLTVPASAK          | ✓      |      |        |      |            |      |
| Rtn3        | Q9ES97             | Reticulon-3                                              | 69.7  | C344c    | TS C# TTESTGLDR                      | ✓      | ✓    | ✓      | ✓    |            |      |
| Rtn4        | Q99P72             | Reticulon-4                                              | 90.6  | C319c    | SKDKEDLV C# SAALHNPQESPATLTK         | ✓      |      |        |      |            |      |
| Arhgap5     | P97393             | Rho GTPase-activating protein 5                          | 58.4  | C30c     | EPRPPSYTVSVVGLSGTEKDKGN C# GVGk      |        | ✓    |        |      |            |      |
| Ryr2        | E9Q401             | Ryanodine receptor 2                                     | 38.9  | C3008c   | EKEMVTSLF C# K                       | ✓      |      |        |      |            |      |
| Atp2a2      | O55143             | Sarcoplasmic/endoplasmic reticulum calcium ATPase 2      | 80    | C669c    | DA C# LNAR                           | ✓      | ✓    | ✓      | ✓    | ✓          | ✓    |
| Atp2a2      | O55143             | Sarcoplasmic/endoplasmic reticulum calcium ATPase 2      | 83.9  | C998c    | NYLEQPGKE C# VQPATK                  | ✓      |      |        |      | ✓          | ✓    |
| Scrn1       | Q9CZC8             | Secernin-1                                               | 80    | C324c    | AQSP C# FGDDDDPAKKEPR                | ✓      |      |        |      | ✓          | ✓    |
| Sept6       | Q9R1T4             | Septin-6                                                 | 65.2  | C14c     | QVGED C# R                           | ✓      |      |        |      |            |      |
| Sept7       | O55131             | Septin-7                                                 | 64.4  | C17c     | SVN C# GTMAQPK                       | ✓      | ✓    |        |      |            |      |
| Srr         | Q9QZX7             | Serine racemase                                          | 85.5  | C217c    | VYAAEPSNADD C# YQSK                  | ✓      |      |        |      |            |      |
| Dclk1       | Q9JLM8             | Serine/threonine-protein kinase DCLK1                    | 79.3  | C276c    | YQDDFLLDESE C# R                     | ✓      |      |        |      |            |      |
| Dclk2       | Q6PGN3             | Serine/threonine-protein kinase DCLK2                    | 79    | C287c    | YAQDDFVLHSE C# R                     | ✓      | ✓    | ✓      | ✓    |            |      |
| Wnk2        | Q3UH66             | Serine/threonine-protein kinase WNK2                     | 57    | C1946c   | AVQTQQP C# SVR                       | ✓      |      |        |      |            |      |
| Tf          | Q92111             | Serotransferrin                                          | 72.3  | C472c    | S C# HTGVDR                          | ✓      | ✓    | ✓      | ✓    | ✓          | ✓    |
| Tf          | Q92111             | Serotransferrin                                          | 75.1  | C67c     | TSYPD C# IK                          | ✓      | ✓    | ✓      | ✓    |            |      |
| Tf          | Q92111             | Serotransferrin                                          | 84.4  | C692c    | LLEA C# TFHKH                        |        |      |        | ✓    | ✓          |      |
| Alb         | P07724             | Serum albumin                                            | 76.4  | C289c    | YM C# ENQATISSK                      | ✓      |      |        |      | ✓          | ✓    |
| Sgip1       | Q8VD37             | SH3-containing GRB2-like protein 3-interacting protein 1 | 54.9  | C402c    | E C# GLGQR                           |        |      | ✓      |      |            |      |
| Slc6a11     | P31650             | Sodium- and chloride-dependent GABA transporter 3        | 91.7  | C607c    | TVT VND C# EAK                       | ✓      | ✓    | ✓      | ✓    | ✓          | ✓    |
| Atp1a3      | Q6PIC6             | Sodium/potassium-transporting ATPase subunit alpha-3     | 76.9  | C49c     | KYNTD C# VQGLTHSK                    | ✓      | ✓    | ✓      | ✓    | ✓          | ✓    |

**Table S1. SNO-proteins and SNO-Cys sites.** SNO-proteins and SNO-Cys sites detected in the cortex, hippocampus and cerebellum of control and CK-p25 mice. The ✓ symbol in the last column indicates the detection of the SNO-peptide using both Approach A and B according to tissue and genotype. SPI %, scored peak intensity obtained with Approach B. Hipp, hippocampus.

**Table S1. SNO-proteins and SNO-Cys sites**

| Gene Symbol | UniprotKB Access #                   | Entry name                                                    | SPI % | SNO-Site | Sequence (# denotes SNO-Cys site) | Cortex |      | Hipp   |      | Cerebellum |      |
|-------------|--------------------------------------|---------------------------------------------------------------|-------|----------|-----------------------------------|--------|------|--------|------|------------|------|
|             |                                      |                                                               |       |          |                                   | CK-p25 | Ctrl | CK-p25 | Ctrl | CK-p25     | Ctrl |
| Atp1a3      | Q6PIC6                               | Sodium/potassium-transporting ATPase subunit alpha-3          | 90    | C221c    | SPD C# THDNPLETR                  | ✓      | ✓    | ✓      | ✓    | ✓          | ✓    |
| Atp1a3      | Q6PIC6                               | Sodium/potassium-transporting ATPase subunit alpha-3          | 90.2  | C42c     | MSVEEV C# RK                      | ✓      | ✓    | ✓      | ✓    | ✓          | ✓    |
| Atp1a3      | Q6PIC6                               | Sodium/potassium-transporting ATPase subunit alpha-3          | 83.5  | C49c     | YNTD C# VQGLTHSK                  | ✓      | ✓    | ✓      | ✓    | ✓          | ✓    |
| Atp1b1      | P14094                               | Sodium/potassium-transporting ATPase subunit beta-1           | 89.5  | C214c    | YNPNVLPVQ C# TGK                  | ✓      |      |        |      | ✓          |      |
| Atp1b1      | P14094                               | Sodium/potassium-transporting ATPase subunit beta-1           | 55.7  | C277c    | VE C# K                           | ✓      | ✓    | ✓      | ✓    | ✓          | ✓    |
| Atp1b2      | P14231                               | Sodium/potassium-transporting ATPase subunit beta-2           | 68.2  | C129c    | NDV C# RPGR                       | ✓      | ✓    | ✓      | ✓    | ✓          | ✓    |
| Sf1         | Q64213                               | Splicing factor 1                                             | 67.7  | C279c    | SITNTTV C# TK                     |        |      |        |      | ✓          |      |
| Srcin1      | Q9QWI6                               | SRC kinase signaling inhibitor 1                              | 86    | C1017c   | AIPDLD C# ASK                     | ✓      | ✓    |        | ✓    |            |      |
| Stub1       | Q9WUD1                               | STIP1 homology and U box-containing protein 1                 | 58.2  | C200c    | AQQA C# IEAK                      |        |      |        |      |            | ✓    |
| sygp1       | Q8CHC4                               | Synaptojanin-1                                                | 63.8  | C1051c   | TSP C# QSPTVPEYSAPSLPIRPSRAPSR    | ✓      |      |        |      |            |      |
| syp         | Q62277                               | Synaptophysin                                                 | 86.6  | C87c     | LHQVYFDAPS C# VK                  | ✓      | ✓    | ✓      | ✓    | ✓          | ✓    |
| Syp         | Q62277                               | Synaptophysin                                                 | 73.1  | C184c    | MATDPENIIKEMPM C# R               | ✓      | ✓    |        |      |            |      |
| Syp         | Q62277                               | Synaptophysin                                                 | 61.5  | C191c    | QTGNT C# K                        | ✓      | ✓    | ✓      | ✓    | ✓          | ✓    |
| Syp         | Q62277                               | Synaptophysin                                                 | 78.9  | C184c    | EMPM C# R                         | ✓      | ✓    | ✓      | ✓    | ✓          | ✓    |
| Snap47      | Q8R570                               | Synaptosomal-associated protein 47                            | 62.4  | C330c    | G C# TPHRELPTGGQEGEQLQLQK         |        |      |        |      | ✓          |      |
| Snph        | Q80U23                               | Syntaphilin                                                   | 62.3  | C43c     | DAYGTSSLSSSSNSGS C# K             | ✓      |      |        |      |            |      |
| Stxbp5l     | Q5DQR4                               | Syntaxin-binding protein 5-like                               | 72    | C608c    | SLSGSTNTVSSEGVTKDSIP C# LSVK      | ✓      |      |        |      |            |      |
| Tcp1        | P11983                               | T-complex protein 1 subunit alpha                             | 82.2  | C357c    | I C# DDELILIK                     | ✓      |      |        |      |            |      |
| Tecpr1      | Q80VP0                               | Tectonin beta-propeller repeat-containing protein 1           | 72.4  | C480c    | SDE C# RGPASTPAELPWTNIDLKEPK      | ✓      |      |        |      |            |      |
| Ercc2       | O08811                               | TFIIH basal transcription factor complex helicase XPD subunit | 57.3  | C134c    | C# HSLTASYVR                      | ✓      |      |        |      |            |      |
| Thop1       | Q8C1A5                               | Thimet oligopeptidase                                         | 61.2  | C687c    | GLQVEGSEAPA C#                    | ✓      |      |        |      |            |      |
| Tm2d2       | Q8R0I4                               | TM2 domain-containing protein 2                               | 32.7  | C128c    | ALEGIE C# AS                      | ✓      |      |        |      |            |      |
| Tceal3      | Q8R0A5<br>Q8CCT4                     | Transcription elongation factor A protein-like 3              | 70.3  | C142c    | E C# ADMTR                        | ✓      | ✓    | ✓      | ✓    |            | ✓    |
| Tacc1       | Q6Y685                               | Transforming acidic coiled-coil-containing protein 1          | 56.6  | C479c    | KYEAQPLDLDA C# SQDEGAVISK         | ✓      |      |        |      |            |      |
| Tsn         | Q62348                               | Translin                                                      | 76    | C225c    | GFNKETAAA C# GEK                  |        |      |        |      |            | ✓    |
| Tuba1a      | P68369<br>P05213<br>P68373<br>P68368 | Tubulin alpha-1A chain                                        | 78.1  | C316c    | HGKYMA C# C# LLYRGDVVPK           | ✓      |      |        |      | ✓          |      |
| Tubb2a      | Q7TMM9                               | Tubulin beta-2A chain                                         | 90.7  | C354c    | TAV C# DIPPR                      | ✓      | ✓    | ✓      | ✓    | ✓          | ✓    |
| Tubb2a      | Q7TMM9                               | Tubulin beta-2A chain                                         | 79.6  | C303c    | NMMAA C# DPR                      | ✓      | ✓    | ✓      | ✓    | ✓          | ✓    |

**Table S1. SNO-proteins and SNO-Cys sites.** SNO-proteins and SNO-Cys sites detected in the cortex, hippocampus and cerebellum of control and CK-p25 mice. The ✓ symbol in the last column indicates the detection of the SNO-peptide using both Approach A and B according to tissue and genotype. SPI %, scored peak intensity obtained with Approach B. Hipp, hippocampus.

**Table S1. SNO-proteins and SNO-Cys sites**

| Gene Symbol | UniprotKB Access #                                       | Entry name                                                  | SPI % | SNO-Site | Sequence (# denotes SNO-Cys site)     | Cortex |      | Hipp   |      | Cerebellum |      |
|-------------|----------------------------------------------------------|-------------------------------------------------------------|-------|----------|---------------------------------------|--------|------|--------|------|------------|------|
|             |                                                          |                                                             |       |          |                                       | CK-p25 | Ctrl | CK-p25 | Ctrl | CK-p25     | Ctrl |
| Tubb2a      | Q7TMM9<br>Q9CWF2<br>Q9ERD7<br>P99024<br>Q9D6F9<br>P68372 | Tubulin beta-2A chain                                       | 79.5  | C12c     | <b>MREIVHIQAGQ C# GNQIGAK</b>         | ✓      | ✓    | ✓      | ✓    | ✓          | ✓    |
| Uchl1       | Q9R0P9                                                   | Ubiquitin carboxyl-terminal hydrolase isozyme L1            | 61.6  | C152c    | <b>AK C# FEKNEAIQAAHDSVAQEGQ C# R</b> | ✓      |      |        |      |            |      |
| Uba52       | P62984                                                   | Ubiquitin-60S ribosomal protein L40                         | 71.9  | C110c    | <b>AVN C# R</b>                       |        |      | ✓      |      |            |      |
| Ube2o       | Q6ZPJ3                                                   | Ubiquitin-conjugating enzyme E2 O                           | 79.1  | C593c    | <b>VQS C# PDPAVYGVVQSGDHVGR</b>       | ✓      |      |        |      |            |      |
| Uba5        | Q8VE47                                                   | Ubiquitin-like modifier-activating enzyme 5                 | 71.2  | C33c     | <b>SGGDGH C# GR</b>                   | ✓      | ✓    | ✓      | ✓    |            | ✓    |
| Ubxn2b      | Q0KL01                                                   | UBX domain-containing protein 2B                            | 73.7  | C54c     | <b>STPAT C# R</b>                     | ✓      |      | ✓      |      |            |      |
| Vcam1       | P29533                                                   | Vascular cell adhesion protein 1                            | 71.3  | C668c    | <b>QAQLQDAGIYE C# ESKTEVGSQLR</b>     | ✓      |      |        |      |            |      |
| Vcan        | Q62059                                                   | Versican core protein                                       | 86.9  | C3258c   | <b>GTVA C# GQPPVVENAK</b>             | ✓      |      |        |      |            | ✓    |
| Vcan        | Q62059                                                   | Versican core protein                                       | 65.4  | C217c    | <b>EG C# YGDMMGK</b>                  | ✓      |      |        |      |            |      |
| Slc32a1     | Slc32a1                                                  | Vesicular inhibitory amino acid transporter                 | 26.10 | C70c     | <b>SEGEPE C# GDEGAEAPVEGDIHYQR</b>    | ✓      |      |        |      |            |      |
| Vdac2       | Q60930                                                   | Voltage-dependent anion-selective channel protein 2         | 95.1  | C48c     | <b>S C# SGVEFSTSGSSNTDTGK</b>         | ✓      |      |        |      |            | ✓    |
| Cacna2d3    | Q9Z1L5                                                   | Voltage-dependent calcium channel subunit alpha-2/delta-3   | 86.8  | C969c    | <b>LKQTLEP C# DTEYPAFVSER</b>         | ✓      |      |        |      |            |      |
| Cacna1a     | P97445                                                   | Voltage-dependent P/Q-type calcium channel subunit alpha-1A | 71.6  | C2327c   | <b>AAG C# ASPR</b>                    |        | ✓    |        |      |            | ✓    |
| Atp6v1g1    | Q9CR51                                                   | V-type proton ATPase subunit G 1                            | 71.5  | C69c     | <b>EAAALGSHGS C# SSEVEKETR</b>        |        |      |        |      |            | ✓    |
| Wfdc1       | Q9ESH5                                                   | WAP four-disulfide core domain protein 1                    | 65.2  | C80c     | <b>C# QADSE C# PR</b>                 | ✓      |      |        |      |            |      |

**Table S1. SNO-proteins and SNO-Cys sites.** SNO-proteins and SNO-Cys sites detected in the cortex, hippocampus and cerebellum of control and CK-p25 mice. The ✓ symbol in the last column indicates the detection of the SNO-peptide using both Approach A and B according to tissue and genotype. SPI %, scored peak intensity obtained with Approach B. Hipp, hippocampus.
